# Supplementary material for: Decoupling the role of carbon counterparts in Pickering emulsifier for an enhanced selective oxidation of benzyl alcohol
Source: Royal Society of Chemistry journal article supplement (doi:10.1039/d0gc01855d), 2020-01-01
Supplement: d0gc01855d1.pdf [file d0gc01855d1.pdf]

## Supporting Information

### **Decoupling the Role of Carbon Counterpart in Pickering Emulsifier for Enhanced Selective Oxidation of Benzyl Alcohol**

Lin Ni<sup>1</sup>, Chang Yu<sup>1\*</sup>, Qianbing Wei<sup>1</sup>, Jiangwei Chang<sup>1</sup>, and Jieshan Qiu<sup>1,2\*</sup>

*<sup>1</sup>State Key Lab of Fine Chemicals, School of Chemical Engineering, Liaoning Key Lab for Energy Materials and Chemical Engineering, Dalian University of Technology, Dalian 116024, China*

*<sup>2</sup>College of Chemical Engineering, Beijing University of Chemical Technology, Beijing, China*

*\*Corresponding author: E-mail: chang.yu@dlut.edu.cn (C. Yu) ;  
carbon@dlut.edu.cn (J. S. Qiu)*

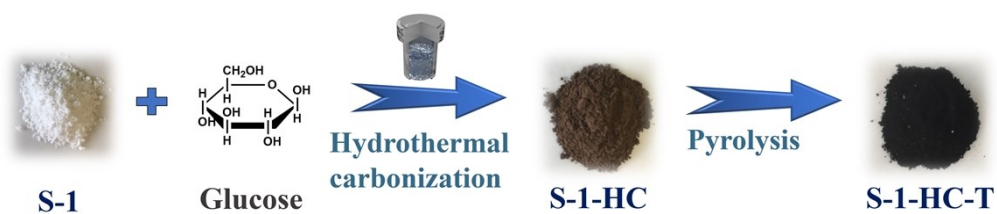

**Scheme S1.** Graphical illustration of the synthesis route for the S-1-HC-T nanocomposites.

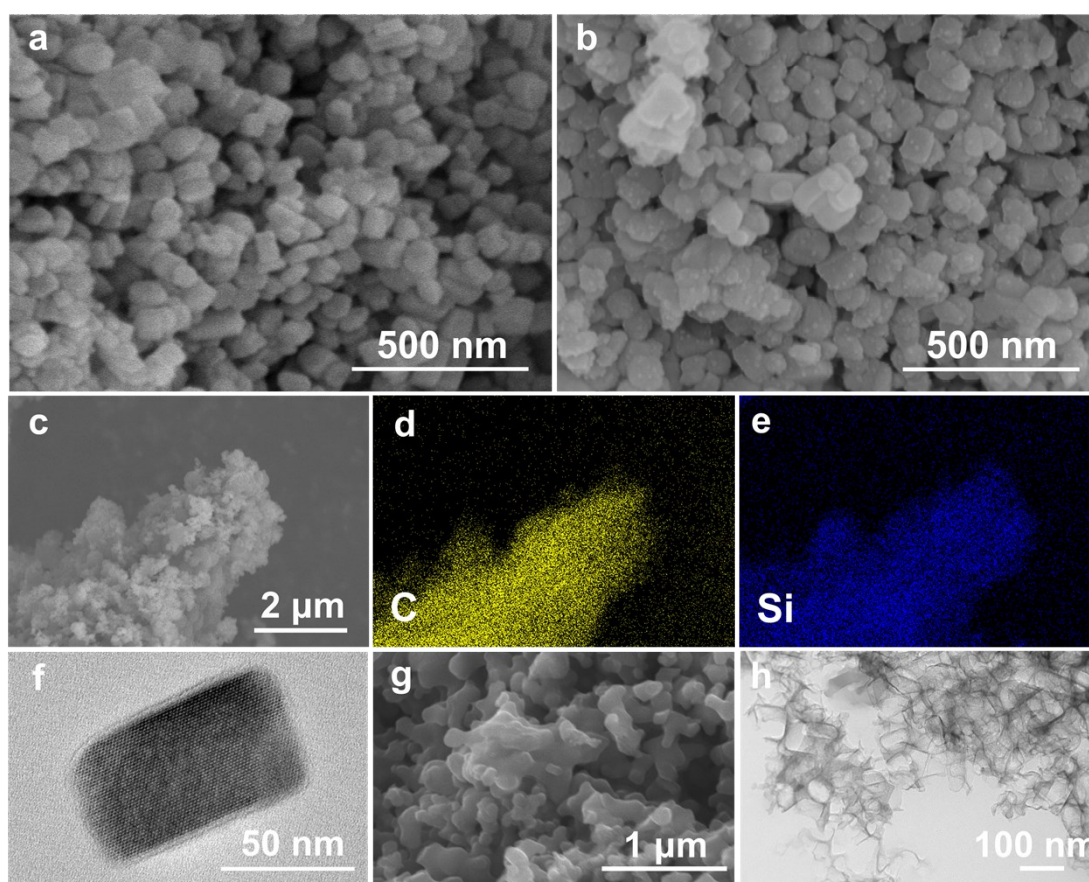

**Fig. S1 The microstructure of samples.** (a, b) SEM images of pristine S-1 nanoparticles and S-1-HC-700. (c) SEM image and (d, e) the corresponding C (yellow dots) and Si (blue dots) elements mapping of S-1-HC-700. (f) TEM image of S-1. (g) SEM image of HC-700. (h) TEM image of HC-700 (etched).

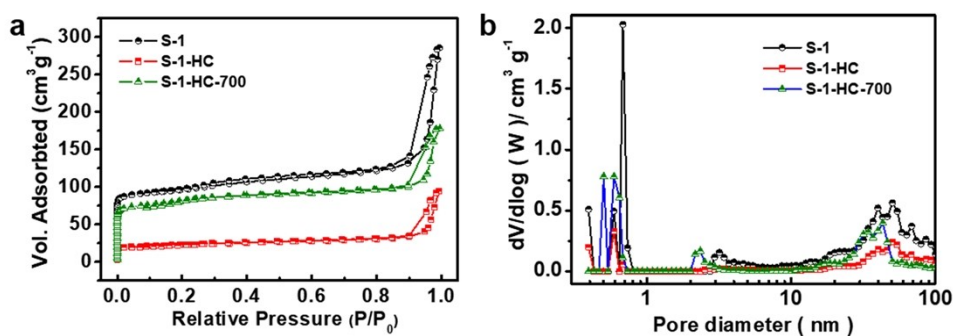

**Fig. S2** (a)  $N_2$  adsorption-desorption isotherms and (b) the corresponding pore size distributions for a series of samples.

**Table S1.** Chemical elemental analysis for the carbon counterparts obtained under the same hydrothermal and pyrolysis conditions without S-1 zeolite.

| Samples | C (wt.%) | H (wt.%) | O (wt.%) | O/C<br>(at.) | H/C<br>(at.) | (O+H)/C<br>(at.) |
|---------|----------|----------|----------|--------------|--------------|------------------|
| HC      | 63.32    | 4.68     | 31.65    | 0.375        | 0.887        | 1.262            |
| HC-500  | 86.46    | 2.90     | 10.24    | 0.089        | 0.402        | 0.491            |
| HC-700  | 93.99    | 1.10     | 4.29     | 0.034        | 0.140        | 0.174            |
| HC-900  | 94.97    | 0.39     | 3.85     | 0.030        | 0.049        | 0.079            |

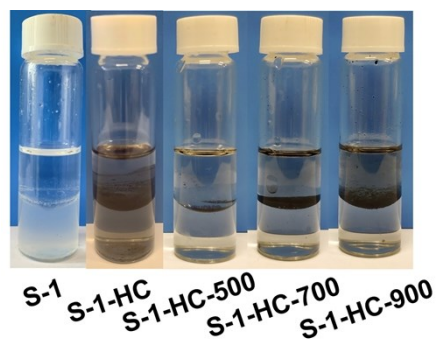

**Fig. S3** Space distribution for as-obtained nanocomposites in the water/toluene biphasic system with  $2.5 \text{ mg} \cdot \text{mL}^{-1}$ .

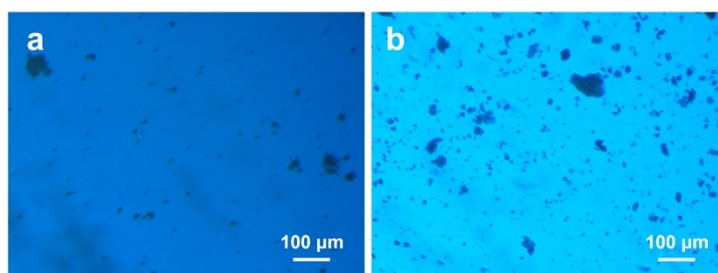

**Fig. S4** Optical images of water/ toluene emulsion stabilized by (a) S-1, (b) HC.

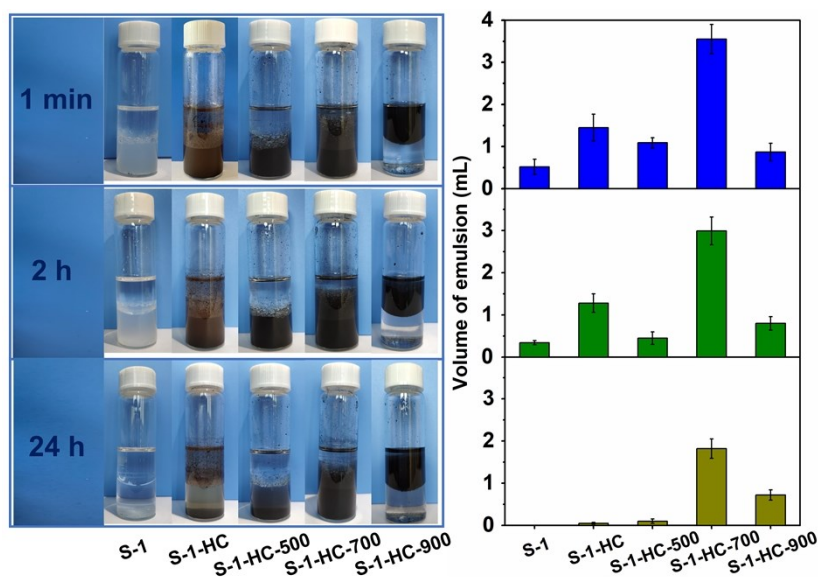

**Fig. S5** Volume of Pickering emulsion stabilized by S-1 and surface modified S-1 nanocomposites, where emulsion was kept under static conditions for a different time.

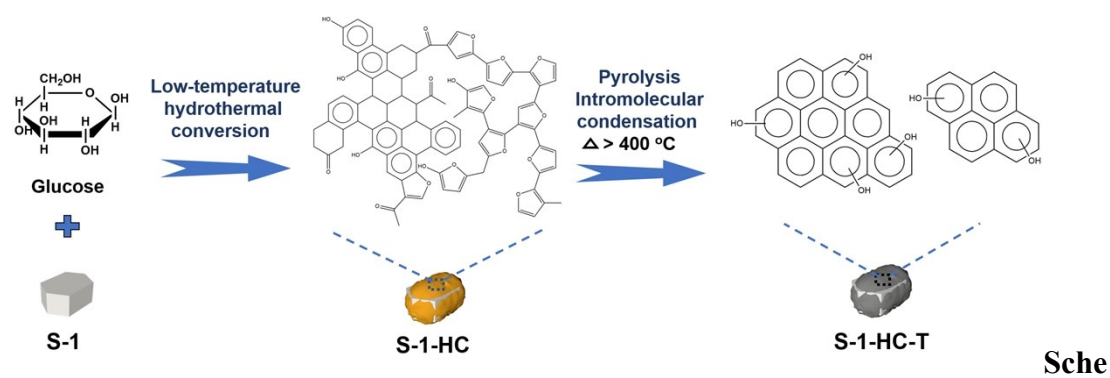

**me S2.** Schematic illustration of the structural transformation process for glucose-derived hydrothermal carbon.

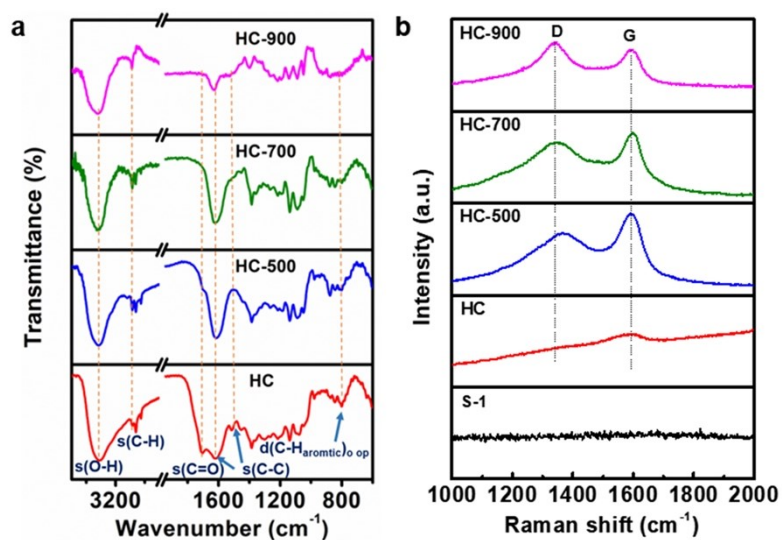

**Fig. S6** Chemical structure information for a series samples. (a) FT-IR spectra of



HC and HC-T samples. (b) Raman spectra of S-1, HC, HC-500, HC-700 and HC-900.

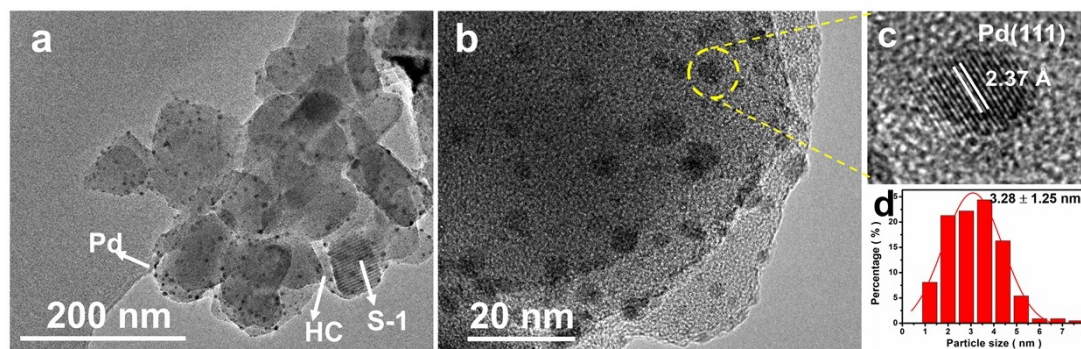

**Fig. S7** (a) Low- and (b) high-magnification TEM images of Pd/S-1-HC-700. (c) High-resolution TEM image and (d) particle size distribution of the corresponding Pd nanoparticles for Pd/S-1-HC-700.

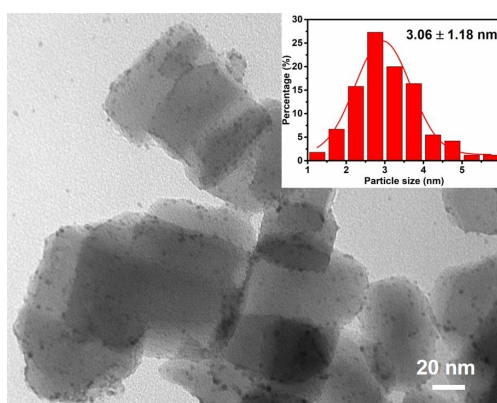

**Fig. S8** TEM image of the Pd/S-1. The inset image is the particle size distribution of the corresponding Pd nanoparticles for Pd/S-1.

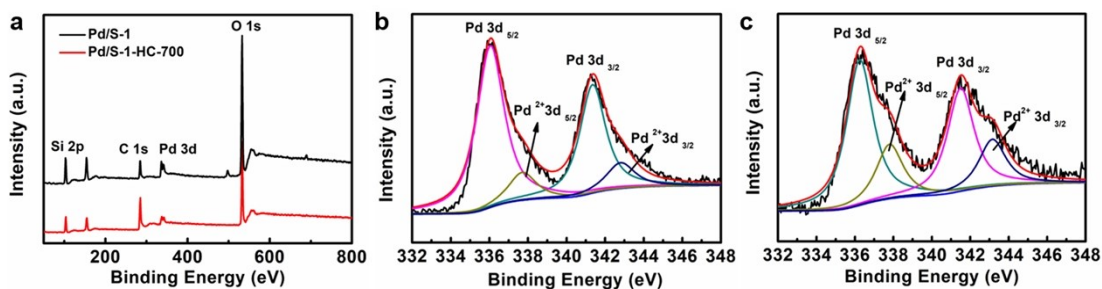

**Fig. S9** (a) XPS survey spectra of Pd/S-1 and Pd/S-1-HC-700; (b) Pd 3d XPS spectra of Pd/S-1 and (c) Pd 3d XPS spectra of Pd/S-1-HC-700.

**Table S2.** The atomic contents of Pd (0) and Pd (2+) species for Pd/S-1 and Pd/S-1-HC-700 samples derived from XPS spectra.

| Catalysts     | Pd species    |                |
|---------------|---------------|----------------|
|               | Pd (0) (at.%) | Pd (2+) (at.%) |
| Pd/S-1        | 82.90         | 17.10          |
| Pd/S-1-HC-700 | 62.83         | 37.17          |

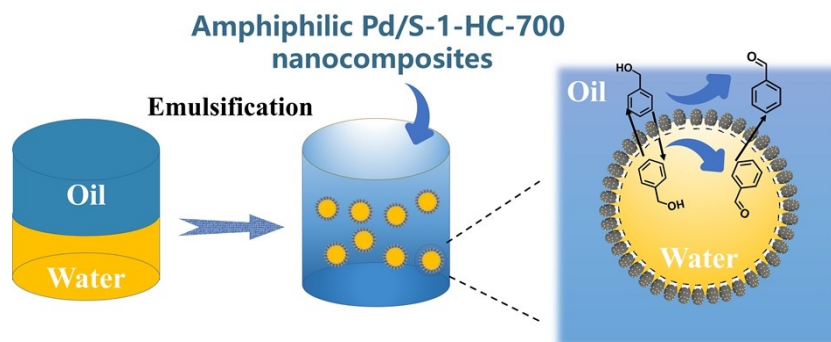

**Scheme S3.** Schematic illustration for the aerobic oxidation of benzyl alcohol catalyzed by Pd nanoparticles at the interface of oil-water with the amphiphilic Pd/S-1-HC-700.

**Table S3.** Catalytic performance of the different catalysts for the oxidation of benzyl alcohol.

| Catalysts  | Temperature (°C) | Conversion (%) | Selectivity (%) |                       | TOF (h <sup>-1</sup> ) <sup>[b]</sup> |
|------------|------------------|----------------|-----------------|-----------------------|---------------------------------------|
|            |                  |                | Benzaldehyde    | Others <sup>[a]</sup> |                                       |
| Pd/S-1-500 | 85               | 9.6            | 99.6            | 0.4                   | 68.1                                  |
| Pd/S-1-700 | 85               | 7.7            | 99.9            | 0.1                   | 51.3                                  |
| Pd/S-1-900 | 85               | 11.4           | 99.8            | 0.2                   | 75.9                                  |
| Pd/HC-500  | 85               | 21.6           | 99.9            | 0.1                   | 11.0                                  |
| Pd/HC-700  | 85               | 40.3           | 99.9            | 0.1                   | 29.4                                  |
| Pd/HC-900  | 85               | 25.0           | 99.9            | 0.1                   | 9.0                                   |

[a] Benzoic acid, dibenzyl ether, and benzyl benzoate.

[b] Calculated as moles of benzyl alcohol converted per mole of total Pd per hour. A reaction time of 30 min was used. The number of active sites was calculated according to ICP test results.

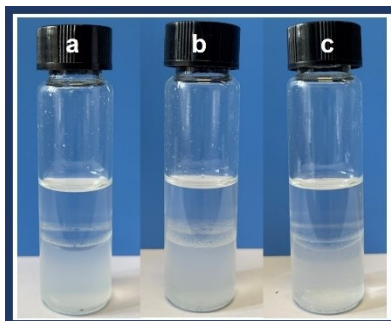

**Fig. S10** Digital photos of the Pickering emulsion stabilized by (a) S-1-500, (b) S-1-700, and (c) S-1-900 in a biphasic system made of water and toluene (volume ratio: 3 mL/3 mL) after handshaking and being kept under static conditions for 1 min.

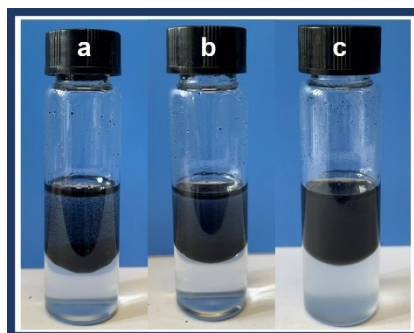

**Fig. S11** Digital photos of Pickering emulsion stabilized by (a) HC-500, (b) HC-700, and (c) HC-900 in a biphasic system made of water and toluene (volume ratio: 3 mL/3 mL) after handshaking and being kept under static conditions for 1 min.

**Table S4.** A comparison of the Pd/S-1-HC-700 with recently reported catalysts for selective oxidation of benzyl alcohol.

| Catalysts     | Conversion (%) | Selectivity (%) | Temperature (°C) | Catalyst amount (mg) | Time | References                          |
|---------------|----------------|-----------------|------------------|----------------------|------|-------------------------------------|
| Pd/S-1-HC-700 | 97             | 99              | 85               | 50                   | 2 h  | This work                           |
| Holey HEO     | 98             | 29              | 120              | 10                   | 2 h  | Angew. Chem. Int. Ed., 2020, 59,2-9 |

|                                   |    |     |     |     |        |                                                  |
|-----------------------------------|----|-----|-----|-----|--------|--------------------------------------------------|
| Au <sub>38</sub> /LDH             | 63 | 99  | 100 | -   | 10 min | J. Catal., 2020, 389, 409-420                    |
| Pd <sub>1</sub> /CeO <sub>2</sub> | 27 | 100 | 100 | 10  | 3 h    | Angew. Chem. Int. Ed., 2018, 57, 4642 -4646      |
| 4Pd/CN                            | 33 | 100 | 80  | 25  | 3 h    | Appl. Catal. A: Gen., 2017, 542, 380-388         |
| Co-NG-750                         | 95 | 97  | 130 | 5   | 5 h    | Appl. Catal. A: Gen., 2017, 543, 61-66           |
| Pd-P/PCF                          | 77 | 85  | 70  | 10  | 2 h    | Catal. Sci. Technol., 2018, 8, 2333-2339         |
| Rh/RAC1                           | 52 | 58  | 100 | 200 | 24 h   | Appl. Catal. A: Gen., 2019, 570, 271-282         |
| Pd/CNTs                           | 98 | 89  | 90  | 300 | 6 h    | Catal. Sci. Technol., 2015, 5, 4144-4153         |
| Vac-H <sub>2</sub>                | 99 | 87  | 130 | 9   | 3 h    | J. Catal., 2017, 350 21-29                       |
| Ru/CNT-TiO <sub>2</sub>           | 73 | 99  | 85  | 300 | 3 h    | Chem-Eur. J. 2013, 19, 16192 -16195              |
| Ru/LDH-CNTs                       | 68 | 99  | 85  | 200 | 3 h    | ACS Appl. Mater. Interfaces 2015, 7, 12203-12209 |

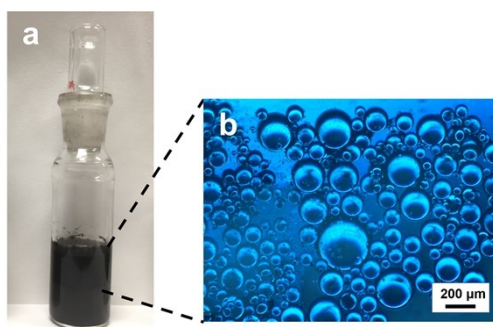

**Fig. S12** Optical images of water/ toluene emulsion stabilized by Pd/S-1-HC-700 after four cycles.



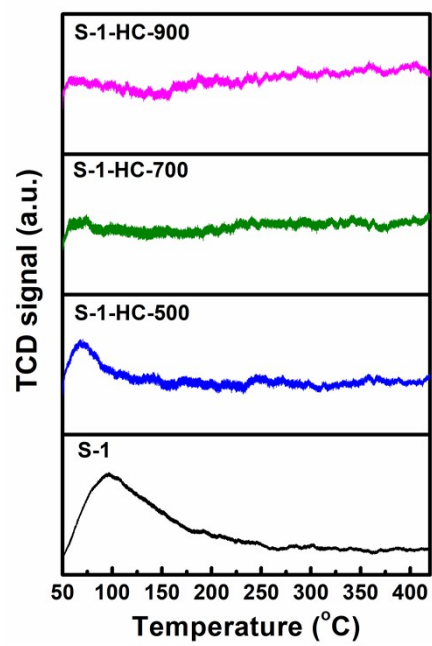

**Fig. S13** CO<sub>2</sub>-TPD profiles of S-1, S-1-HC-500, S-1-HC-700 and S-1-HC-900.
